# Supplementary material
Source: HighWire-hosted journal article supplement (https://erj.ersjournals.com/content/54/2/1900354)
Supplement: inline-supplementary-material-1 [file inline-supplementary-material-1.pdf]

## Predictors of delirium after cardiac surgery in patients with sleep-disordered breathing

### - Online data supplement -

#### Authors:

Maria Tafelmeier<sup>1</sup>, Marvin Knapp<sup>1</sup>, Simon Lebek<sup>1</sup>, Bernhard Floerchinger<sup>2</sup>, Daniele Camboni<sup>2</sup>, Marcus Creutzenberg<sup>3</sup>, Sigrid Wittmann<sup>3</sup>, Florian Zeman<sup>4</sup>, Christof Schmid<sup>2</sup>, Lars Siegfried Maier<sup>1</sup>, Stefan Wagner<sup>1</sup>, Michael Arzt<sup>1</sup>

#### Assessment of sleep-disordered breathing

The night before CABG, nasal flow, pulse oximetry, and thoracic breathing effort were measured with the Alice NightOne device (Philips Respironics, Murrysville, USA). The sleep data acquired by the Alice NightOne devices was scored by trained medical staff using the corresponding Sleepware G3 sleep diagnostic software (Philips Respironics, Murrysville, USA). Apnea was defined as a  $\geq 90$  decrease in airflow for  $\geq 10$  seconds, hypopnea as a decrease in airflow by  $\geq 30$ -90% versus baseline for  $\geq 10$  seconds, and desaturation as a  $\geq 4\%$  decrease in oxygen saturation [1, 2]. The apnea-hypopnea index (AHI) is expressed as the frequency of apnea or hypopnea events per hour recording time, and an AHI of  $\geq 15$ /hour was considered the cut-off for the diagnosis of SDB. Patients with SDB and  $\geq 50\%$  of central apnea events were classified into the CSA group and patients with  $< 50\%$  of central apnea events into the OSA group.

We performed an internal validation study in a sub-sample of 50 consecutive patients by a blinded trained investigator, who classified the hypopneas into their central and obstructive nature. Among the 50 patients, 23 (46%) had no SDB and 27 (54%) had SDB, of those 21 (42%) had OSA and 6 (12%) had CSA according to the definition used in the main analysis of the present study. Using an alternative definition including central and obstructive hypopnoeas "Patients with SDB and  $\geq 50\%$  of central apnoea and hypopnoea events were classified into the CSA group and patients with  $< 50\%$  of central apnoea and hypopnoeas events into the OSA group" only one patient changed from the CSA to the OSA group. Thus, both definitions for diagnosing CSA and OSA provide similar results ( $p=0.945$ ). Moreover, the ratios central apnoea index/obstructive apnoea index and central apnea-hypopnea index/obstructive apnoea-hypopnea index were similar (0.17 [0.01; 0.80] versus 0.23 [0.09; 0.58],  $p=0.806$ ).

**Standardized clinical treatment**

In general, all patients undergoing elective CABG surgery at the Department of Cardiothoracic Surgery of the University Medical Center Regensburg (Germany) get admitted to the hospital one day prior to CABG surgery. Predisposing risk factors for postoperative delirium, such as demographics, common comorbidities, medication, and laboratory data were assessed by means of the patients' clinical records. No premedication was routinely administered the night prior to surgery.

Anesthesia was induced with a standardized regimen of sufentanil, etomidate, and rocuronium and maintained with sufentanil and sevoflurane. Details of the maintenance of anesthesia were at the discretion of the anesthesiologist. After surgery, all patients were transferred to the intensive care unit (ICU) while being intubated and sedated. Standardized postoperative sedation consisted of propofol and opioids.

All patients received postoperative treatment according to the 'fast-track recovery' care protocol that aims at early extubation, prompt implementation of mobility, and occupational therapy within ICU and intermediate care (IMC) settings [3, 4]. Patients were weaned from mechanical ventilation at the discretion of the ICU physicians. All patients received supplemental oxygen according to the standards of the surgical ICU and IMC, but not with the intention to treat sleep-disordered breathing. Within the standard postoperative care of patients, special emphasis was placed on the rational titration of sedatives and opioids, reduced exposure to benzodiazepines, and appropriate use of antipsychotic drugs [5, 6]. Further strategies for the prevention of postoperative delirium included optimization of hydration and electrolytes [7], promotion of sleep [8], continuous administration of oxygen, non-supine positioning, and adequate monitoring of oxygen saturation levels [9]. Moreover, visual and hearing adaptations were provided for patients with sensory impairments.

**Figure legends****Figure E1: CAM-ICU worksheet**

The CAM-ICU worksheet is a concise description on how to conduct CAM-ICU in a standardized manner.

**Figure E2: Postoperative oxygen flow rates**

Oxygen flow rates in liter per minute (l/min) during the postoperative period, starting upon termination of invasive ventilation until the fourth postoperative night. Data are shown in median (25./75. percentile) for patients without SDB, with OSA and with CSA (A) and for patients without and with postoperative delirium (B).

**Figure E3 Parameters of nocturnal hypoxia as predictors of postoperative delirium**

Forest plot of parameters of nocturnal hypoxia as preoperative risk factors for postoperative delirium. Values are presented as OR: Odds ratio and 95% CI: confidence interval. ¶ mean SpO<sub>2</sub> < median 92%; § time of SpO<sub>2</sub> <90%/total recording time > median 9.4.

**Table E1 Patient characteristics**

|                                    | overall         | sub-analysis population      | drop-out population         | p-value              |
|------------------------------------|-----------------|------------------------------|-----------------------------|----------------------|
| n (%)                              | 241             | 141 (100)                    | 100 (100)                   |                      |
| Age, years                         | 68 ± 9          | 68 ± 9                       | 68 ± 9                      | 0.632 <sup>T</sup>   |
| Male sex, n (%)                    | 194 (85)        | 123 (87)                     | 71 (81)                     | 0.180 <sup>Chi</sup> |
| Body mass index, kg/m <sup>2</sup> | 28.5 ± 4.2      | 28.7 ± 4.0                   | 28.2 ± 4.4                  | 0.377 <sup>T</sup>   |
| NT-proBNP, pg/ml                   | 435 (119; 1102) | 408 (112; 1166) <sup>*</sup> | 452 (135; 931) <sup>†</sup> | 0.921 <sup>W</sup>   |

Baseline variables of the sub-analysis population and of patients who were excluded from the sub-analysis population (drop-out population). Data are presented as mean ± standard deviation or median (25.; 75. percentile) unless otherwise stated. NT-pro BNP: N-terminal pro-brain natriuretic peptide; TIA: transient ischemic attack; <sup>\*</sup>n=131, <sup>†</sup>n=64.

**Table E2 Patient characteristics**

|                                                         | overall           | no postoperative delirium | postoperative delirium | p-value                         |
|---------------------------------------------------------|-------------------|---------------------------|------------------------|---------------------------------|
| n (%)                                                   | 141 (100)         | 108 (77)                  | 33 (23)                |                                 |
| Age, years                                              | 68 ± 9            | 66 ± 8                    | 73 ± 7                 | <b>&lt;0.001</b> <sup>T</sup>   |
| Male sex, n (%)                                         | 123 (87)          | 95 (85)                   | 28 (88)                | 0.639 <sup>Chi</sup>            |
| Body mass index, kg/m <sup>2</sup>                      | 28.7 ± 4.0        | 29.1 ± 4.0                | 27.2 ± 3.7             | <b>0.017</b> <sup>T</sup>       |
| <b>Cardiovascular risk factors</b>                      |                   |                           |                        |                                 |
| Hypertension, n (%)                                     | 119 (84)          | 88 (81)                   | 31 (94)                | 0.084 <sup>Chi</sup>            |
| Hyperlipoproteinemia, n (%)                             | 91 (64)           | 68 (63)                   | 23 (70)                | 0.479 <sup>Chi</sup>            |
| Diabetes mellitus, n (%)                                | 45 (32)           | 30 (28)                   | 15 (45)                | 0.057 <sup>Chi</sup>            |
| Smoking, n (%)                                          | 88 (62)           | 67 (62)                   | 21 (64)                | 0.868 <sup>Chi</sup>            |
| Family history of CAD, n (%)                            | 50 (36)           | 43 (40)                   | 7 (21)                 | 0.108 <sup>Chi</sup>            |
| <b>Comorbidities</b>                                    |                   |                           |                        |                                 |
| Heart failure (NT-proBNP cut-off)* <sup>†</sup> , n (%) | 41 (31)           | 23 (23)                   | 18 (56)                | <b>&lt;0.001</b> <sup>Chi</sup> |
| NYHA class III/IV, n (%)                                | 44 (31)           | 32 (30)                   | 12 (36)                | 0.465 <sup>Chi</sup>            |
| LV ejection fraction, %                                 | 58 ± 10           | 59 ± 10                   | 57 ± 9                 | 0.467 <sup>T</sup>              |
| LV ejection fraction <55%, n (%)                        | 29 (21)           | 18 (17)                   | 11 (33)                | 0.053 <sup>Chi</sup>            |
| Atrial fibrillation, n (%)                              | 31 (22)           | 21 (19)                   | 10 (30)                | 0.187 <sup>Chi</sup>            |
| History of TIA or stroke, n (%)                         | 20 (14)           | 9 (8)                     | 11 (33)                | <b>&lt;0.001</b> <sup>Chi</sup> |
| Respiratory disease, n (%)                              | 9 (6)             | 7 (6)                     | 2 (6)                  | 0.931 <sup>Chi</sup>            |
| Depression, n (%)                                       | 6 (4)             | 4 (4)                     | 2 (6)                  | 0.557 <sup>Chi</sup>            |
| History of alcohol abuse, n (%)                         | 17 (13)           | 15 (15)                   | 2 (7)                  | 0.276 <sup>Chi</sup>            |
| <b>Laboratory data</b>                                  |                   |                           |                        |                                 |
| NT-proBNP, pg/ml*                                       | 408 (112; 1166)   | 182 (87; 766)             | 1536 (593; 3432)       | <b>&lt;0.001</b> <sup>W</sup>   |
| Hemoglobin, g/dl                                        | 14.2 (12.7; 15.2) | 14.3 (13.2; 15.3)         | 13.0 (12.0; 14.9)      | <b>0.005</b> <sup>W</sup>       |
| Creatinine, mg/dl                                       | 1.0 (0.9; 1.2)    | 0.9 (0.8; 1.1)            | 1.2 (1.0; 1.3)         | <b>0.001</b> <sup>W</sup>       |
| GFR, ml/min/1.73qm                                      | 75 (57; 89)       | 81 (63; 91)               | 60 (46; 69)            | <b>&lt;0.001</b> <sup>W</sup>   |
| Sodium, mmol/l                                          | 140 (139; 142)    | 140 (139; 142)            | 140 (138; 143)         | 0.662 <sup>W</sup>              |
| Albumin, g/l <sup>#</sup>                               | 37.8 (36.4; 40.0) | 38.6 (36.9; 40.6)         | 37.0 (35.4; 38.3)      | 0.054 <sup>W</sup>              |

Baseline variables of the study population of patients (n=141) without and with postoperative delirium. Data are presented as mean ± standard deviation or median (25.; 75. percentile) unless otherwise stated. \*n=131; <sup>T</sup>student's t-test; <sup>Chi</sup>Chi-square test; <sup>W</sup>Wilcoxon-Mann-Whitney test. CAD: coronary artery disease; NYHA: New York Heart Association; LV: left ventricular; NT-pro BNP: N-terminal pro-brain natriuretic peptide; TIA: transient ischemic attack; GFR: glomerular filtration rate; <sup>†</sup>NT-proBNP ≥450 pg/mL (patients < 50 years of age), ≥900 pg/mL (patients ≥50 and <75 years of age) or ≥1800 pg/mL (patients ≥75 years of age); <sup>#</sup> n=48.

**Table E3      Nocturnal respiration**

|                                                    | overall          | no postoperative delirium | postoperative delirium | p-value                        |
|----------------------------------------------------|------------------|---------------------------|------------------------|--------------------------------|
| <b>Nocturnal respiration</b>                       |                  |                           |                        |                                |
| Total recording time, min                          | 483 (465; 500)   | 483 (464; 500)            | 484 (466; 501)         | 0.737 <sup>w</sup>             |
| Apnea hypopnea index, per hour                     | 15.8 (9.6; 29.2) | 14.4 (8.4; 26.0)          | 23.7 (12.0; 38.0)      | <b>0.028<sup>w</sup></b>       |
| Obstructive apnea index, per hour                  | 4.2 (1.9; 8.9)   | 3.8 (1.7; 8.9)            | 5.4 (3.4; 8.5)         | 0.106 <sup>w</sup>             |
| Central apnea index, per hour                      | 2.0 (0.5; 8.5)   | 1.6 (0.4; 6.2)            | 7.3 (0.9; 22.4)        | <b>0.025<sup>w</sup></b>       |
| Oxygen desaturation index, per hour                | 13.6 (6.6; 27.0) | 12.1 (5.8; 23.7)          | 21.1 (8.2; 33.1)       | 0.098 <sup>w</sup>             |
| Mean SpO <sub>2</sub> , %                          | 92 (91; 93)      | 92 (91; 93)               | 92 (90; 93)            | 0.714 <sup>w</sup>             |
| Min SpO <sub>2</sub> , %                           | 82 (77; 85)      | 82 (77; 85)               | 82 (76; 86)            | 0.542 <sup>w</sup>             |
| Time of SpO <sub>2</sub> <90%/Total recording time | 9.4 (1.9; 22.4)  | 9.7 (1.3; 22.1)           | 8.2 (2.3; 27.2)        | 0.961 <sup>w</sup>             |
| Sleep-disordered breathing, n (%)                  | 72 (51)          | 50 (46)                   | 22 (67)                | <b>0.040<sup>Chi</sup></b>     |
| Obstructive sleep apnea, n (%)                     | 37 (26)          | 32 (30)                   | 5 (15)                 | 0.098 <sup>Chi</sup>           |
| Central sleep apnea, n (%)                         | 35 (25)          | 18 (17)                   | 17 (51)                | <b>&lt;0.001<sup>Chi</sup></b> |

Nocturnal respiration data of the study population of patients without and with postoperative delirium. Data are presented as median (25.; 75. percentile) unless otherwise stated. <sup>Chi</sup> Chi-square test; <sup>w</sup> Wilcoxon-Mann-Whitney test.

**Table E4 Postoperative opioid administration**

|                                     | overall           | no postoperative delirium | postoperative delirium | p-value              |
|-------------------------------------|-------------------|---------------------------|------------------------|----------------------|
| <b>Opioids</b>                      |                   |                           |                        |                      |
| Pethidine, n (%)                    | 55 (39)           | 42 (39)                   | 13 (39)                | 0.958 <sup>Chi</sup> |
| Piritramide, n (%)                  | 135 (96)          | 103 (95)                  | 32 (97)                | 0.690 <sup>Chi</sup> |
| Hydromorphone (oral), n (%)         | 80 (57)           | 64 (60)                   | 16 (49)                | 0.250 <sup>Chi</sup> |
| Morphine (oral), n (%)              | 10 (7)            | 7 (7)                     | 3 (10)                 | 0.563 <sup>Chi</sup> |
| Morphine (i.v.) dose equivalent, mg | 18.2 (11.5; 30.0) | 18.2 (11.1; 30.1)         | 18.6 (14.4; 29.5)      | 0.814 <sup>W</sup>   |

Postoperative administration of opioids and total total Morphine (i.v.) dose equivalent during the first three postoperative days in patients with and without postoperative delirium. Data are presented as numbers and percentages or as median (25.; 75. percentile). <sup>Chi</sup> Chi-square test, <sup>W</sup> Wilcoxon-Mann-Whitney test.

**Table E5 Perioperative data**

|                                      | overall            | no postoperative delirium | postoperative delirium | p-value                   |
|--------------------------------------|--------------------|---------------------------|------------------------|---------------------------|
| Type of surgery                      |                    |                           |                        |                           |
| CABG and valve surgery, n (%)        | 34 (24)            | 22 (20)                   | 12 (36)                | 0.110 <sup>Chi</sup>      |
| CABG and aortic valve surgery, n (%) | 28 (20)            | 19 (18)                   | 9 (27)                 |                           |
| CABG and mitral valve surgery, n (%) | 6 (4)              | 3 (3)                     | 3 (9)                  |                           |
| Surgery details                      |                    |                           |                        |                           |
| Number of performed grafts, n        | 2 (2; 3)           | 2 (2; 3)                  | 2 (2; 3)               | 0.434 <sup>W</sup>        |
| Duration of ischemia, min            | 54.0 (43.8; 73.3)  | 52.5 (41.0; 70.5)         | 63.0 (46.3; 78.8)      | 0.085 <sup>W</sup>        |
| Duration of bypass, min              | 89.5 (68.3; 114.5) | 87.5 (66.0; 108.5)        | 104.0 (82.3; 129.3)    | <b>0.020 <sup>W</sup></b> |
| Anaesthetics                         |                    |                           |                        |                           |
| Ketamine, n (%)                      | 12 (9)             | 11 (11)                   | 1 (3)                  | 0.231 <sup>Chi</sup>      |
| Etomidate, n (%)                     | 104 (79)           | 81 (79)                   | 23 (79)                | 0.938 <sup>Chi</sup>      |
| Propofol, n (%)                      | 65 (49)            | 50 (49)                   | 15 (52)                | 0.762 <sup>Chi</sup>      |
| Midazolam, n (%)                     | 43 (33)            | 35 (34)                   | 8 (28)                 | 0.516 <sup>Chi</sup>      |
| Sufentanil, n (%)                    | 132 (100)          | 103 (100)                 | 29 (100)               |                           |
| Pancuronium, n (%)                   | 120 (91)           | 92 (89)                   | 28 (97)                | 0.231 <sup>Chi</sup>      |
| Rocuronium, n (%)                    | 12 (9)             | 11 (8)                    | 1 (1)                  | 0.231 <sup>Chi</sup>      |
| Sevoflurane, n (%)                   | 131 (99)           | 102 (99)                  | 29 (100)               | 0.594 <sup>Chi</sup>      |

Perioperative data of patients without and with postoperative delirium. Data are presented as median (25.; 75. percentile) or numbers and percentages. <sup>Chi</sup> Chi-square test; <sup>W</sup> Wilcoxon-Mann-Whitney test. CABG: coronary artery bypass grafting.

**Table E6**      **Extended multivariable logistic regression model for postoperative delirium as a dependent variable**

| Variable                                       | OR   | 95% CI        | p-value      |
|------------------------------------------------|------|---------------|--------------|
| CSA (reference: no SDB or OSA)                 | 4.33 | (1.17; 16.11) | <b>0.029</b> |
| Age ≥70 years                                  | 6.51 | (1.93; 21.95) | <b>0.003</b> |
| Male sex                                       | 0.96 | (0.20; 4.71)  | 0.960        |
| Body mass index <25 kg/m <sup>2</sup>          | 3.14 | (0.74; 13.33) | 0.121        |
| Diabetes mellitus                              | 1.00 | (0.30; 3.30)  | 0.994        |
| Heart failure <sup>‡</sup>                     | 2.58 | (0.73; 9.19)  | 0.142        |
| History of transient ischemic attack or stroke | 5.35 | (1.28; 22.37) | <b>0.022</b> |
| Anemia <sup>*</sup>                            | 2.74 | (0.76; 9.88)  | 0.123        |
| Renal failure <sup>†</sup>                     | 0.83 | (0.22; 3.07)  | 0.779        |
| CABG and valve surgery                         | 1.08 | (0.31; 3.79)  | 0.905        |
| Preoperative need for loop diuretics           | 4.44 | (1.19; 16.54) | <b>0.026</b> |

Multivariable regression analysis. Association of preoperative parameters with postoperative delirium. Values are presented as OR: Odds ratio and 95% CI: confidence interval. OSA: obstructive sleep apnoea; CSA: central sleep apnoea; SDB: sleep-disordered breathing; <sup>\*</sup>Hemoglobin <12 g/dl (women) or <13 g/dl (men); <sup>†</sup> GFR <60 ml/min/1.73 m<sup>2</sup>; <sup>‡</sup> NT-proBNP ≥450 pg/mL (patients < 50 years of age), ≥900 pg/mL (patients ≥50 and <75 years of age) or ≥1800 pg/mL (patients ≥75 years of age).



**Table E7** Studies evaluating the association between sleep-disordered breathing and postoperative delirium

| Study, year                         | study type                                     | source of patients          | n   | SDB<br>assessment       | delirium<br>assessment | mean age $\pm$ SD<br>(years) | prevalence of<br>postoperative<br>delirium | endpoints                                      | p-value | independent risk<br>factors for delirium                                          |
|-------------------------------------|------------------------------------------------|-----------------------------|-----|-------------------------|------------------------|------------------------------|--------------------------------------------|------------------------------------------------|---------|-----------------------------------------------------------------------------------|
| <b>CONSIDER AF<br/>sub-analysis</b> | prospective<br>observational,<br>single center | CABG $\pm$ valve<br>surgery | 141 | PG,<br>AHI $\geq$ 15/h  | CAM-ICU                | 67.7 $\pm$ 8.6               | 23.4%                                      | <b>prevalence of postoperative delirium</b>    | <0.001  | age $\geq$ 70 years<br>history of TIA or stroke<br>CSA<br>heart failure<br>anemia |
|                                     |                                                |                             |     |                         |                        |                              |                                            | no SDB<br>15.9%                                |         |                                                                                   |
|                                     |                                                |                             |     |                         |                        |                              |                                            | OSA<br>13.5%                                   |         |                                                                                   |
|                                     |                                                |                             |     |                         |                        |                              |                                            | CSA<br>48.6%                                   |         |                                                                                   |
| Flink et al.,<br>2013 [10]          | prospective<br>observational,<br>single center | knee arthroplasty           | 106 | PSG,<br>medical records | CAM-ICU<br>DRS-R98     | $\geq$ 65                    | 25%                                        | <b>severity of SDB</b>                         | 0.0123  | OSA                                                                               |
|                                     |                                                |                             |     |                         |                        |                              |                                            | no postoperative<br>delirium<br>AHI: 14.4/hour |         |                                                                                   |
|                                     |                                                |                             |     |                         |                        |                              |                                            | postoperative<br>delirium<br>AHI: 23.7/hour    |         |                                                                                   |
| Roggenbach et al.<br>2014 [11]      | prospective<br>observational,<br>single center | cardiac surgery             | 92  | PG                      | CAM-ICU                | 67.5 $\pm$ 9                 | 48%                                        | <b>prevalence of postoperative delirium</b>    | 0.001   | preoperative AHI<br>age<br>smoking status<br>blood transfusion                    |
|                                     |                                                |                             |     |                         |                        |                              |                                            | no OSA<br>20.9%                                |         |                                                                                   |
|                                     |                                                |                             |     |                         |                        |                              |                                            | <b>severity of SDB</b>                         |         |                                                                                   |
|                                     |                                                |                             |     |                         |                        |                              |                                            | no postoperative<br>delirium<br>AHI: 13.2/hour |         |                                                                                   |
|                                     |                                                |                             |     |                         |                        |                              |                                            | postoperative<br>delirium<br>AHI: 27.7/hour    |         |                                                                                   |

Figure E1 RASS and CAM-ICU worksheet

**RASS and CAM-ICU Worksheet**

**Step One: Sedation Assessment**

**The Richmond Agitation and Sedation Scale: The RASS\***

| Score | Term              | Description                                                                                            |                      |
|-------|-------------------|--------------------------------------------------------------------------------------------------------|----------------------|
| +4    | Combative         | Overtly combative, violent, immediate danger to staff                                                  |                      |
| +3    | Very agitated     | Pulls or removes tube(s) or catheter(s); aggressive                                                    |                      |
| +2    | Agitated          | Frequent non-purposeful movement, fights ventilator                                                    |                      |
| +1    | Restless          | Anxious but movements not aggressive vigorous                                                          |                      |
| 0     | Alert and calm    |                                                                                                        |                      |
| -1    | Drowsy            | Not fully alert, but has sustained awakening (eye-opening/eye contact) to voice ( <b>≥10 seconds</b> ) | Verbal Stimulation   |
| -2    | Light sedation    | Briefly awakens with eye contact to voice ( <b>&lt;10 seconds</b> )                                    |                      |
| -3    | Moderate sedation | Movement or eye opening to voice ( <b>but no eye contact</b> )                                         | Physical Stimulation |
| -4    | Deep sedation     | No response to voice, but movement or eye opening to physical stimulation                              |                      |
| -5    | Unarousable       | No response to voice or physical stimulation                                                           |                      |

**Procedure for RASS Assessment**

- Observe patient**
  - Patient is alert, restless, or agitated. (score 0 to +4)
- If not alert, state patient's name and say to open eyes and look at speaker.** (score -1)
  - Patient awakens with sustained eye opening and eye contact. (score -1)
  - Patient awakens with eye opening and eye contact, but not sustained. (score -2)
  - Patient has any movement in response to voice but no eye contact. (score -3)
- When no response to verbal stimulation, physically stimulate patient by shaking shoulder and/or rubbing sternum.**
  - Patient has any movement to physical stimulation. (score -4)
  - Patient has no response to any stimulation. (score -5)

If RASS is -4 or -5, then **Stop** and **Reassess** patient at later time  
 If RASS is above -4 (-3 through +4) then **Proceed to Step 2**

\*Sessler, et al. AJRCCM 2002; 166:1338-1344. Ely, et al. JAMA 2003; 289:2983-2991.

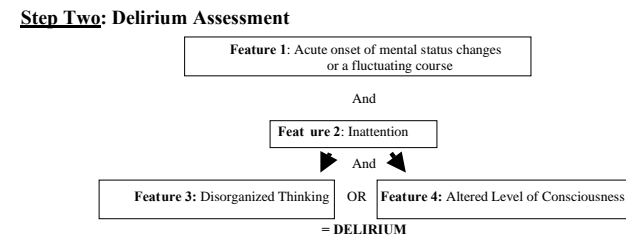

**CAM-ICU Worksheet**

| <b>Feature 1: Acute Onset or Fluctuating Course</b><br>Positive if you answer 'yes' to either 1A or 1B.                                                                                                                                                                                                                                                                                                                                                                                                                                                                                                                                                                            | Positive                                          | Negative |
|------------------------------------------------------------------------------------------------------------------------------------------------------------------------------------------------------------------------------------------------------------------------------------------------------------------------------------------------------------------------------------------------------------------------------------------------------------------------------------------------------------------------------------------------------------------------------------------------------------------------------------------------------------------------------------|---------------------------------------------------|----------|
| <b>1A:</b> Is the pt different than his/her baseline mental status?<br>Or<br><b>1B:</b> Has the patient had any fluctuation in mental status in the past 24 hours as evidenced by fluctuation on a sedation scale (e.g. RASS), GCS, or previous delirium assessment?                                                                                                                                                                                                                                                                                                                                                                                                               | Yes                                               | No       |
| <b>Feature 2: Inattention</b><br>Positive if either score for 2A or 2B is less than 8.<br>Attempt the ASE letters first. If pt is able to perform this test and the score is clear, record this score and move to Feature 3. If pt is unable to perform this test or the score is unclear, then perform the ASE Pictures. If you perform both tests, use the ASE Pictures' results to score the Feature.                                                                                                                                                                                                                                                                           | Positive                                          | Negative |
| <b>2A: ASE Letters:</b> record score (enter NT for not tested)<br><br><i>Directions:</i> Say to the patient. "I am going to read you a series of 10 letters. Whenever you hear the letter 'A,' indicate by squeezing my hand." Read letters from the following letter list in a normal tone.<br><b>S A V E A H A A R T</b><br>Scoring: Errors are counted when patient fails to squeeze on the letter "A" and when the patient squeezes on any letter other than "A."                                                                                                                                                                                                              | Score (out of 10): _____                          |          |
| <b>2B: ASE Pictures:</b> record score (enter NT for not tested)<br>Directions are included on the picture packets.                                                                                                                                                                                                                                                                                                                                                                                                                                                                                                                                                                 | Score (out of 10): _____                          |          |
| <b>Feature 3: Disorganized Thinking</b><br>Positive if the combined score is less than 4                                                                                                                                                                                                                                                                                                                                                                                                                                                                                                                                                                                           | Positive                                          | Negative |
| <b>3A: Yes/No Questions</b><br>(Use either Set A or Set B, alternate on consecutive days if necessary):<br><div style="display: flex; justify-content: space-between;"> <div> <b>Set A</b><br/>           1. Will a stone float on water?<br/>           2. Are there fish in the sea?<br/>           3. Does one pound weigh more than two pounds?<br/>           4. Can you use a hammer to pound a nail?         </div> <div> <b>Set B</b><br/>           1. Will a leaf float on water?<br/>           2. Are there elephants in the sea?<br/>           3. Do two pounds weigh more than one pound?<br/>           4. Can you use a hammer to cut wood?         </div> </div> | <b>Combined Score (3A+3B):</b><br>____ (out of 5) |          |
| <b>3B: Command</b><br>Say to patient: "Hold up this many fingers" (Examiner holds two fingers in front of patient) "Now do the same thing with the other hand" (Not repeating the number of fingers). *If pt is unable to move both arms, for the second part of the command ask patient "Add one more finger"<br><br>Score ____ (Patient earns 1 point if able to successfully complete the entire command)                                                                                                                                                                                                                                                                       |                                                   |          |
| <b>Feature 4: Altered Level of Consciousness</b><br>Positive if the Actual RASS score is anything other than "0" (zero)                                                                                                                                                                                                                                                                                                                                                                                                                                                                                                                                                            | Positive                                          | Negative |
| <b>Overall CAM-ICU</b> (Features 1 and 2 and either Feature 3 or 4):                                                                                                                                                                                                                                                                                                                                                                                                                                                                                                                                                                                                               | Positive                                          | Negative |

Copyright © 2002, E. Wesley Ely, MD, MPH and Vanderbilt University, all rights reserved.

Figure E2 Postoperative oxygen flow rates

A

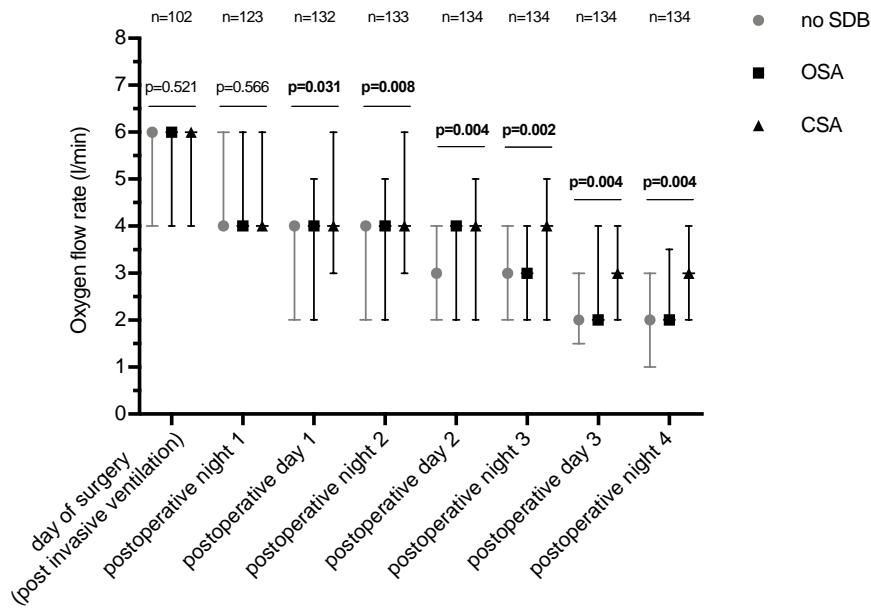

B

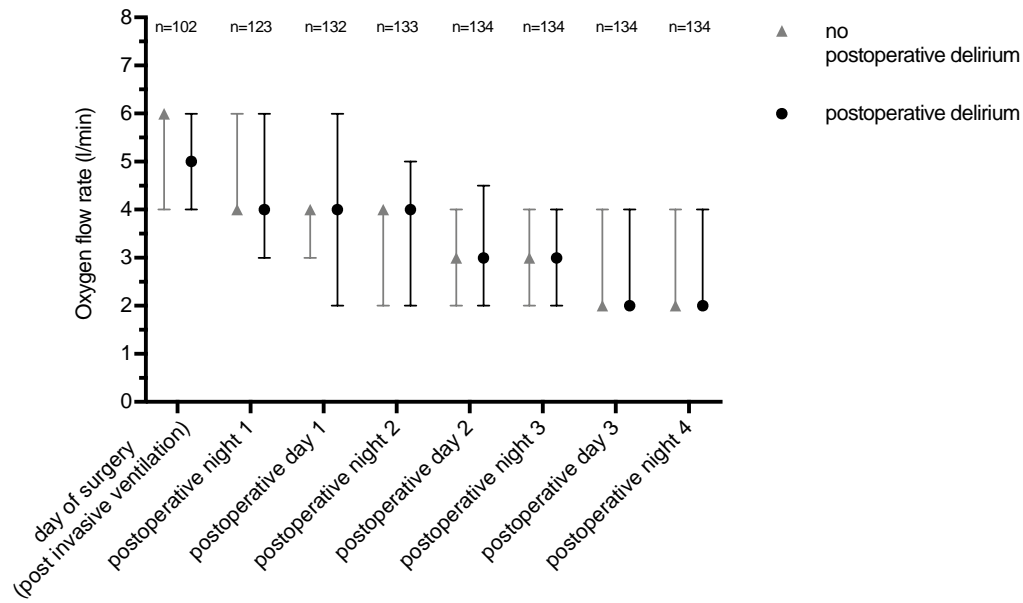

**Figure E3**      **Parameters of nocturnal hypoxia as predictors of postoperative delirium**

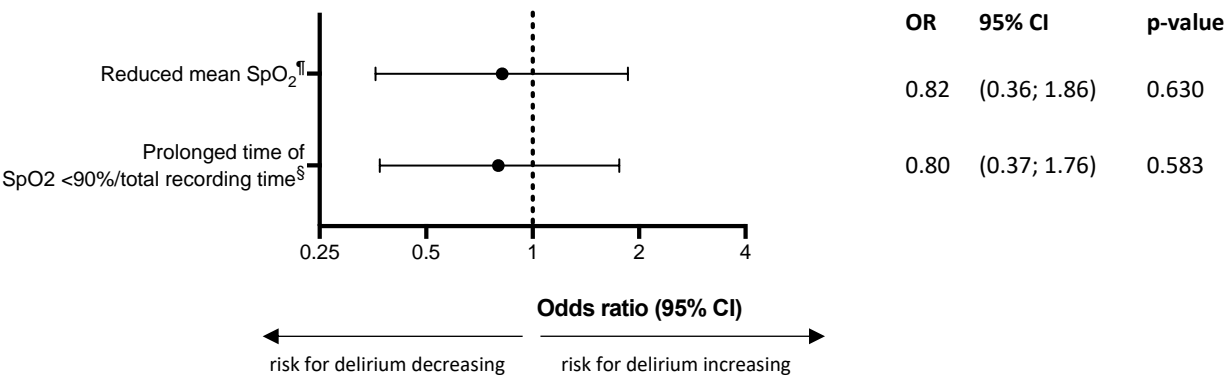

## References

1. Berry RB, Gamaldo CE, Harding SM, Brooks R, Lloyd RM, Vaughn BV, Marcus CL. AASM Scoring Manual Version 2.2 Updates: New Chapters for Scoring Infant Sleep Staging and Home Sleep Apnea Testing. *J Clin Sleep Med* 2015; 11(11): 1253-1254.
2. Berry RB, Brooks R, Gamaldo C, Harding SM, Lloyd RM, Quan SF, Troester MT, Vaughn BV. AASM Scoring Manual Updates for 2017 (Version 2.4). *J Clin Sleep Med* 2017; 13(5): 665-666.
3. Walji S, Peterson RJ, Neis P, DuBroff R, Gray WA, Bengt W. Ultra-fast track hospital discharge using conventional cardiac surgical techniques. *Ann Thorac Surg* 1999; 67(2): 363-369; discussion 369-370.
4. Schweickert WD, Pohlman MC, Pohlman AS, Nigos C, Pawlik AJ, Esbrook CL, Spears L, Miller M, Franczyk M, Deprizio D, Schmidt GA, Bowman A, Barr R, McCallister KE, Hall JB, Kress JP. Early physical and occupational therapy in mechanically ventilated, critically ill patients: a randomised controlled trial. *Lancet* 2009; 373(9678): 1874-1882.
5. Salluh JJ, Wang H, Schneider EB, Nagaraja N, Yenokyan G, Damluji A, Serafim RB, Stevens RD. Outcome of delirium in critically ill patients: systematic review and meta-analysis. *BMJ* 2015; 350: h2538.
6. Marcantonio ER. Delirium in Hospitalized Older Adults. *N Engl J Med* 2017; 377(15): 1456-1466.
7. Brown CH, Laflam A, Max L, Lyman D, Neufeld KJ, Tian J, Shah AS, Whitman GJ, Hogue CW. The Impact of Delirium After Cardiac Surgical Procedures on Postoperative Resource Use. *Ann Thorac Surg* 2016; 101(5): 1663-1669.
8. Kamdar BB, King LM, Collop NA, Sakamuri S, Colantuoni E, Neufeld KJ, Bienvenu OJ, Rowden AM, Touradji P, Brower RG, Needham DM. The effect of a quality improvement intervention on perceived sleep quality and cognition in a medical ICU. *Crit Care Med* 2013; 41(3): 800-809.
9. Gross JB, Bachenberg KL, Benumof JL, Caplan RA, Connis RT, Cote CJ, Nickinovich DG, Prachand V, Ward DS, Weaver EM, Ydens L, Yu S, American Society of Anesthesiologists Task Force on Perioperative M. Practice guidelines for the perioperative management of patients with obstructive sleep apnea: a report by the American Society of Anesthesiologists Task Force on Perioperative Management of patients with obstructive sleep apnea. *Anesthesiology* 2006; 104(5): 1081-1093; quiz 1117-1088.
10. Flink BJ, Rivelli SK, Cox EA, White WD, Falcone G, Vail TP, Young CC, Bolognesi MP, Krystal AD, Trzepacz PT, Moon RE, Kwatra MM. Obstructive sleep apnea and incidence of postoperative delirium after elective knee replacement in the nondemented elderly. *Anesthesiology* 2012; 116(4): 788-796.

11. Roggenbach J, Klamann M, von Haken R, Bruckner T, Karck M, Hofer S. Sleep-disordered breathing is a risk factor for delirium after cardiac surgery: a prospective cohort study. *Crit Care* 2014; 18(5): 477.
